# Supplementary material
Source: PubMed Central journal article supplement (PMC2923229)
Supplement: NIHMS217011-supplement-Supp_Table_S1-S2.pdf [file NIHMS217011-supplement-Supp_Table_S1-S2.pdf]

## **Supporting Information**

### **Regions of interest**

**Anterior Cingulate Cortex (ACC; Brodmann Area 24):** As shown in human studies, the ACC is agranular (lacking a layer IV) and has a prominent layer V. There are three major subdivisions of area 24: area 24a lies partially within the callosal sulcus and has homogeneous layers II and III; area 24b on the gyral surface has a very prominent layer Va and distinct layers IIIa-b and IIIc, and area 24c in the ventral bank of the callosal sulcus has thin layers II-III and no differentiation of layer V (Vogt, 1995).

**Posterior Cingulate Cortex (PCC; Brodmann Area 23):** In contrast to the ACC, BA 23 has a layer IV and a less prominent layer V (Vogt et al., 1995). Blocks from the posterior cingulate were removed at the brain bank, and Nissl stained sections were used to differentiate BA 23 from the surrounding areas (Vogt et al., 2006).

**Fusiform Gyrus (FFG; Brodmann Area 37):** The fusiform gyrus (occipitotemporal gyrus) extends the length of the inferior occipitotemporal surface, bound medially by the parahippocampal gyrus and laterally by the occipitotemporal gyrus in humans. BA 37 is a subdivision of the cytoarchitecturally defined temporal region of cerebral cortex, located primarily in the caudal portions of the fusiform gyrus and inferior temporal gyrus (Brodmann, 1909). The fusiform gyrus was identified on tissue at the brain bank as follows: the medial margin was defined by the collateral and rhinal sulci and the lateral boundary was taken as the sulcus medial to the inferior temporal gyrus (McDonald et al., 2000).

**Table I.** Summary of GABA<sub>B</sub> receptor binding density values in autistic and control cases from the anterior and posterior cingulate cortices.

| Case              | Diagnosis | Anterior Cingulate Cortex<br>(fmol/mg tissue) |                       | Posterior Cingulate Cortex<br>(fmol/mg tissue) |                         |
|-------------------|-----------|-----------------------------------------------|-----------------------|------------------------------------------------|-------------------------|
|                   |           | Superficial                                   | Deep                  | Superficial                                    | Deep                    |
| 1078              | Autism    | 643.25                                        | 811.24                |                                                |                         |
| 1401              | Autism    | 790.97                                        | 368.70                | 963.70                                         | 1019.88                 |
| 1484              | Autism    | 548.04                                        | 351.26                | 1158.92                                        | 1074.94                 |
| 2825              | Autism    | 939.14                                        | 823.09                | 1445.63                                        | 1453.49                 |
| 3845              | Autism    | 360.36                                        | 331.97                | 1911.35                                        | 1349.47                 |
| 4099              | Autism    | 484.16                                        | 589.88                | 1415.91                                        | 1299.98                 |
| 5754              | Autism    | 798.03                                        | 368.08                | 1611.28                                        | 982.78                  |
| <b>Mean ± SEM</b> |           | <b>652.00 ± 76.72</b>                         | <b>520.59 ± 83.29</b> | <b>1272.52 ± 185.26</b>                        | <b>1111.27 ± 108.97</b> |
| 4103              | Control   | 898.59                                        | 553.56                | 2194.37                                        | 1295.61                 |
| 4104              | Control   | 1212.70                                       | 545.45                | 2419.32                                        | 1588.28                 |
| 4188              | Control   | 773.99                                        | 386.45                |                                                |                         |
| 4267              | Control   | 725.08                                        | 561.26                | 1968.94                                        | 1748.37                 |
| 4268              | Control   | 743.67                                        | 479.57                | 1757.45                                        | 1264.78                 |
| 4269              | Control   | 1528.56                                       | 437.66                | 1693.75                                        | 1150.21                 |
| 4271              | Control   | 1582.77                                       | 721.91                | 1676.09                                        | 1239.58                 |
| 4275              | Control   | 907.30                                        | 480.06                | 2282.13                                        | 1793.40                 |
| 4364              | Control   | 800.72                                        | 518.79                |                                                |                         |
| <b>Mean ± SEM</b> |           | <b>1019.26 ± 112.54</b>                       | <b>520.52 ± 31.64</b> | <b>1998.87 ± 114.61</b>                        | <b>1440.03 ± 93.28</b>  |

**Table II.** Specific receptor binding density in the fusiform gyrus in autism and control cases.

|             |                  | <b>Fusiform Gyrus Binding (fmol/mg tissue)</b> |                       |
|-------------|------------------|------------------------------------------------|-----------------------|
| <b>Case</b> | <b>Diagnosis</b> | <b>Superficial</b>                             | <b>Deep</b>           |
| 1664        | Autism           | 125.92                                         | 109.10                |
| 4899        | Autism           | 226.63                                         | 149.16                |
| 5000        | Autism           | 241.66                                         | 126.51                |
| 5027        | Autism           | 235.65                                         | 156.81                |
| 5144        | Autism           | 246.13                                         | 131.46                |
| 5173        | Autism           | 163.79                                         | 92.46                 |
| 6337        | Autism           | 175.78                                         | 126.93                |
| 6677        | Autism           | 201.36                                         | 116.82                |
| <b>Mean</b> | <b>±</b>         | <b>195.22 ± 16.87</b>                          | <b>124.81 ± 7.69</b>  |
| <b>SEM</b>  |                  |                                                |                       |
| 602         | Control          | 287.55                                         | 184.22                |
| 1026        | Control          | 130.70                                         | 104.91                |
| 1365        | Control          | 263.68                                         | 195.18                |
| 4605        | Control          | 350.38                                         | 236.21                |
| 4642        | Control          | 234.40                                         | 187.77                |
| 4916        | Control          | 237.99                                         | 152.72                |
| 5873        | Control          | 246.18                                         | 174.16                |
| 6004        | Control          | 275.04                                         | 156.40                |
| 6207        | Control          | 232.37                                         | 197.40                |
| 6221        | Control          | 320.83                                         | 176.43                |
| <b>Mean</b> | <b>±</b>         | <b>257.91 ± 18.75</b>                          | <b>176.54 ± 10.87</b> |
| <b>SEM</b>  |                  |                                                |                       |
